# Supplementary material for: Incorporation of the New anti-Octadecaborane Laser Dyes into Thin Polymer Films: A Temperature-Dependent Photoluminescence and Infrared Spectroscopy Study
Source: MDPI journal article supplement (doi:10.3390/ijms23158832), 2022-08-08
Supplement: s1 [file s1]

# Incorporation of the new *anti*-octadecaborane laser dyes into thin polymer films: A temperature-dependent photoluminescence and infrared spectroscopy study

Tereza Capkova, Barbora Hanulikova\*, Jakub Sevcik, Pavel Urbanek, Jan Antos, Michal Urbanek, Ivo Kuritka

Centre of Polymer Systems, Tomas Bata University in Zlin, tr. Tomase Bati 5678, 760 01 Zlín, Czech Republic

\* Corresponding author: Barbora Hanulikova, Tel.: +420576031743, Email: hanulikova@utb.cz

## Supplementary Materials

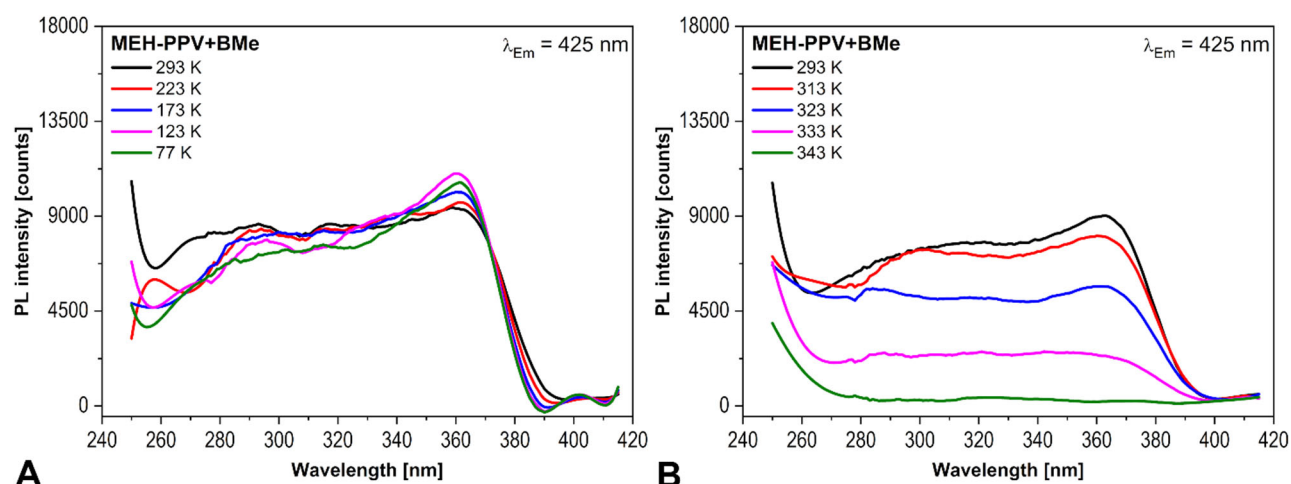

Figure S1: Excitation spectra of MEH-PPV+BMe thin film. Emission wavelength 425 nm. Cooling of the film (A), heating of the film (B).

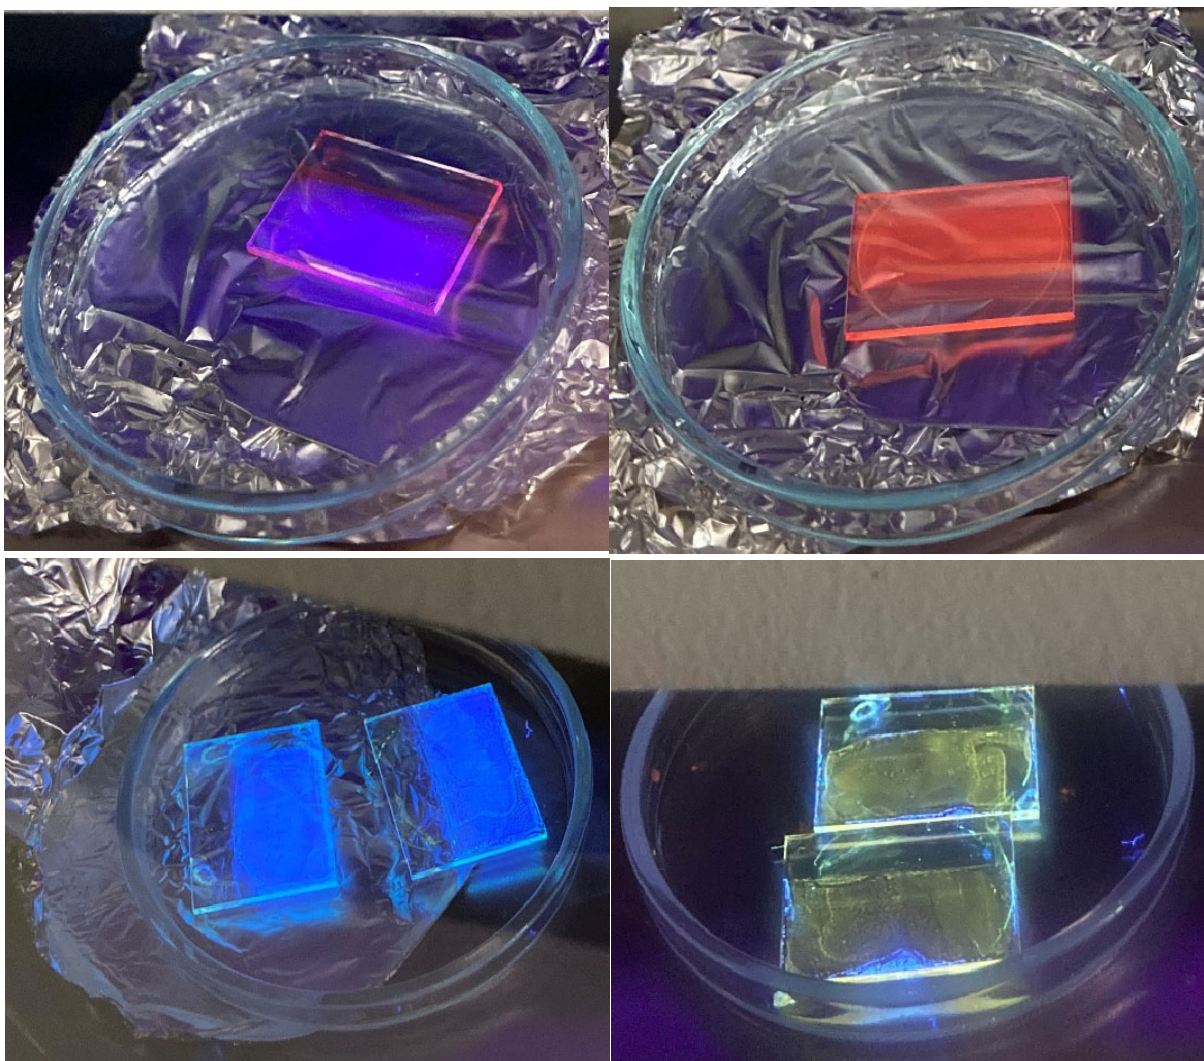

**Figure S2: Photographs of MEH-PPV+BMe (top) and PTMSDPA+BMe (bottom) thin films under a UV lamp before heating (on the left) and after heating (on the right) with and without the blue emission of the borane cluster, respectively.**

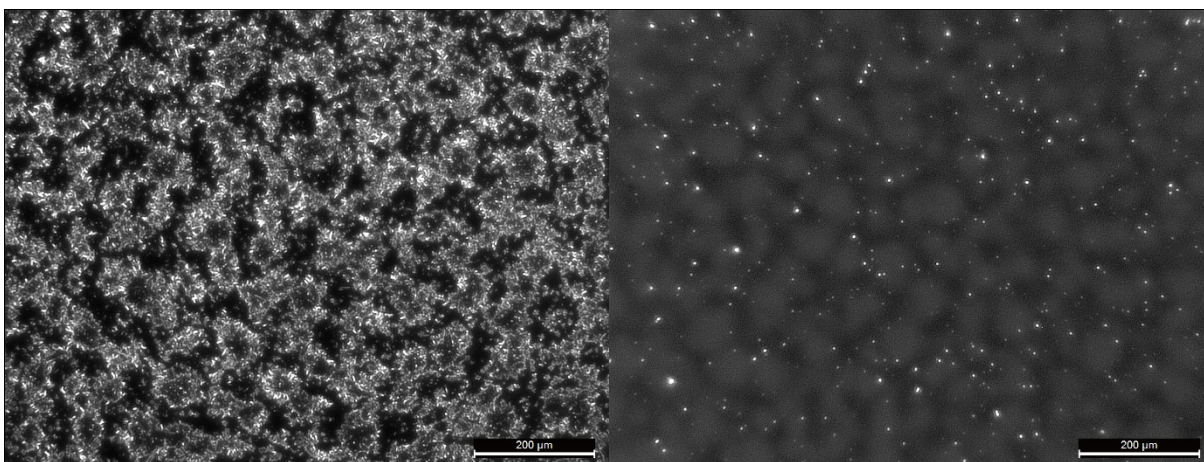

**Figure S3: Images of PTMSDPA+BMe<sup>PL</sup> thin films before (left) and after heating (right). Images were taken with the optical microscope Leica DVM2500 Digital Camera (Leica).**

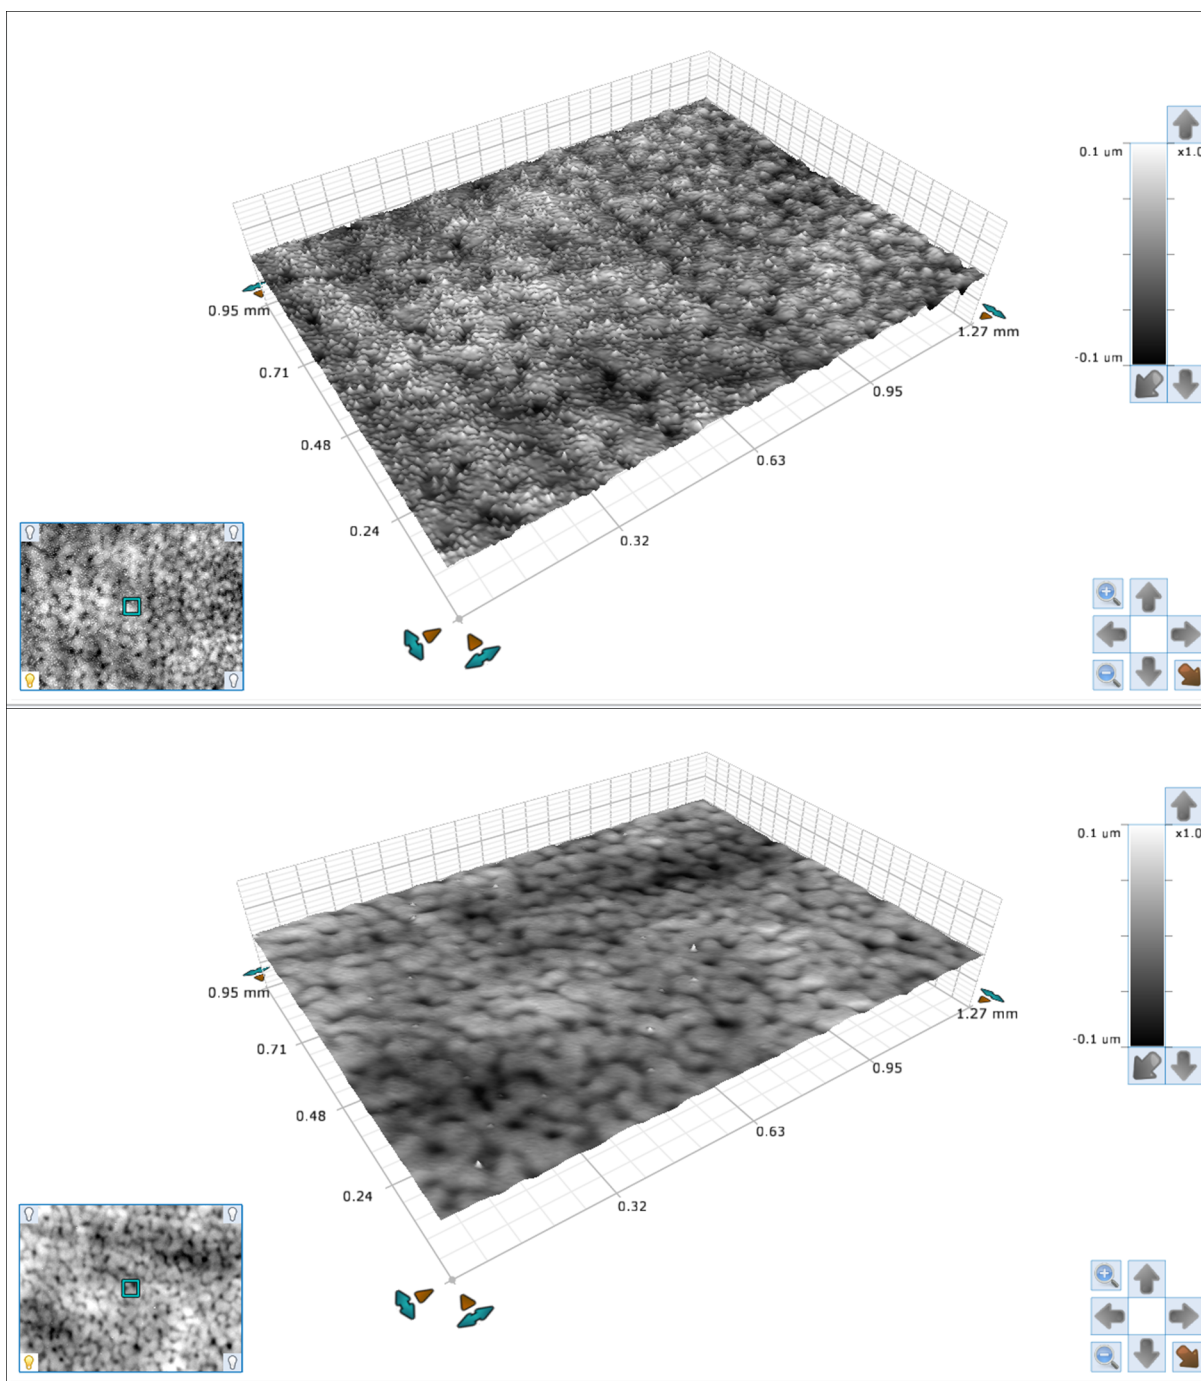

**Figure S4: Images of PTMSDPA+BMe<sup>PL</sup> thin films before (top) and after heating (bottom). Images were taken with the optical profilometer CONTOUR GTK-A (Bruker).**



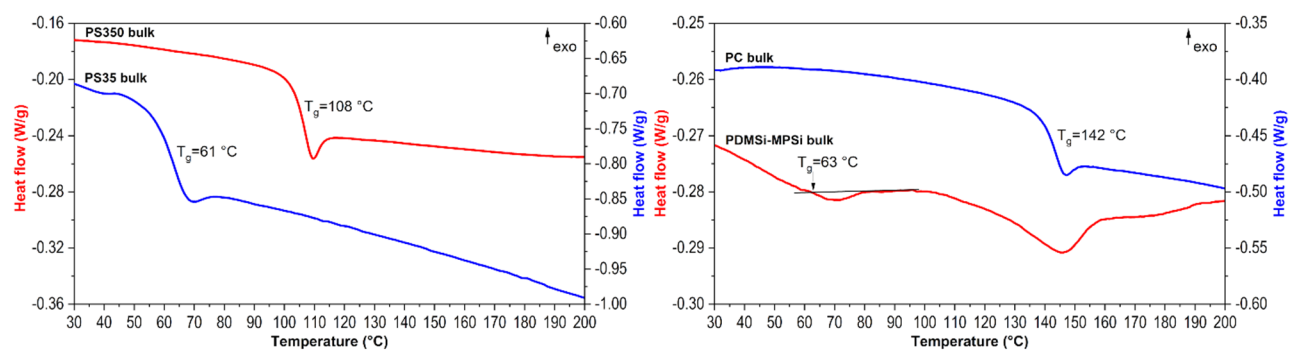

**Figure S5: DSC curves of PS350 and PS35 (on the left) and PC and PDMSi-MPSi (on the right).  $T_g$  extracted from 2nd heating, heating rate  $10\text{ }^{\circ}\text{C}/\text{min}$ . DSC curves were measured using LabSys Evo DTA/DSC (Setaram).**
